# Supplementary material for: A CRISPR-based approach for targeted DNA demethylation
Source: PubMed Central journal article supplement (PMC4853773; doi:10.1038/celldisc.2016.9), 2016-05-03
Supplement: celldisc20169-s2.pdf [file celldisc20169-s2.pdf]

**Supplementary Table 1** Sequences of sgRNA target sites used in the construction of sgRNA2.0-expression plasmids.

| <b>sgRNA</b> | <b>Target site sequence (PAM region)</b><br>Red color highlighted PAM region, which should be omitted in sgRNA oligo synthesis. |
|--------------|---------------------------------------------------------------------------------------------------------------------------------|
| sgRANKL-1    | GTGGAAGAGGCAGCCTCGCC <b>TGG</b>                                                                                                 |
| sgRANKL-2    | TCCTTCATGGGGGCCCTCCA <b>AGG</b>                                                                                                 |
| sgRANKL-3    | CAAGGGGAGTCTGGAACCAC <b>TGG</b>                                                                                                 |
| sgRANKL-4    | ATGGGTAAAGAAGACGCAG <b>AGG</b>                                                                                                  |
| sgRANKL-5    | CTCCTGCATCCATTCTAGTT <b>TGG</b>                                                                                                 |
| sgRANKL-6    | CTTGAAGGTGACATTGAGCG <b>AGG</b>                                                                                                 |
| sgRANKL-7    | TAGCCAGAAGCAAGCATCCG <b>AGG</b>                                                                                                 |
| sgRANKL-8    | CCTCCTCGGATGCTTGCTT <b>TGG</b>                                                                                                  |
| sgMAGEB2-1   | CTTGGCTTTCACGGGAATCA <b>AGG</b>                                                                                                 |
| sgMAGEB2-2   | CACCTGTATAGTCTCGGGGA <b>AGG</b>                                                                                                 |
| sgMAGEB2-3   | TCGCCATTGTTAGCACCGAG <b>AGG</b>                                                                                                 |
| sgMAGEB2-4   | AGAGCCCCCTCGTAACACTT <b>AGG</b>                                                                                                 |
| sgMAGEB2-5   | GGGCCATTTCCACTAGTCCA <b>AGG</b>                                                                                                 |
| sgMAGEB2-6   | AACACACGAGGCATATTGAT <b>GGG</b>                                                                                                 |
| sgMAGEB2-7   | CACCAATGCTGTCACCCTTG <b>GGG</b>                                                                                                 |
| sgMMP2-1     | ACTTGCCCTCTCTCGCGATCT <b>GGG</b>                                                                                                |
| sgMMP2-2     | GGTGACGAGGTCGTGCACTG <b>AGG</b>                                                                                                 |
| sgMMP2-3     | GTCTGGATGCAGCGGAAACA <b>AGG</b>                                                                                                 |
| sgMMP2-4     | AAACATACAAAGGGATTGCC <b>AGG</b>                                                                                                 |
| sgMMP2-5     | GCTCCGAGGGTCCGCTGGCT <b>CGG</b>                                                                                                 |

|           |                                 |
|-----------|---------------------------------|
| sgMMP2-6  | GCGACCCCCGGGCGACGCGC <b>GGG</b> |
| sgMMP2-7  | ACGCTGTGTGCCACCGCCG <b>AGG</b>  |
| sgMMP2-8  | GGGGTCTTTGGCAAGCTAT <b>TGG</b>  |
| sgMMP2-9  | TCCCTTCCAGTAGTTTGCC <b>AGG</b>  |
| sgMMP2-10 | ACACATCTGGGCAGTTGCTA <b>AGG</b> |
| sgMMP2-11 | ACCAATTTGTCCATTAAGCC <b>AGG</b> |
| sgMMP2-12 | ACAACATCTGAACCGCGGTT <b>TGG</b> |
| sgMMP2-13 | ACAAGGGAGCAGATATCCCC <b>TGG</b> |
| sgMMP2-14 | AGCCTCCCCCTCAACCTGTC <b>CGG</b> |
