# Supplementary material for: A CRISPR-based approach for targeted DNA demethylation
Source: PubMed Central journal article supplement (PMC4853773; doi:10.1038/celldisc.2016.9), 2016-05-03
Supplement: celldisc20169-s3.pdf [file celldisc20169-s3.pdf]

**Supplementary Table 2** Percentages of methylated CpG in total CpGs identified using bisulfite-sequencing method (in *RANKL* gene, transient expressing cell line).

| <b>Group names</b>  | <b>Left to right: -700 to TSS site (<i>RANKL</i> promoter)</b> |
|---------------------|----------------------------------------------------------------|
| blank               | 10%, 20%, 40%, 10%, 30%, 50%, 70%, 50%, 40%                    |
| -sgRNA              | 10%, 30%, 30%, 10%, 0%, 20%, 90%, 40%, 100%                    |
| R3: dCas9-CD+MS2-CD | 0%, 10%, 20%, 0%, 0%, 0%, 100%, 60%, 60%                       |
| R3: dCas9-CD+MS2-TM | 0%, 20%, 30%, 0%, 10%, 40%, 90%, 50%, 90%                      |
| R3: dCas9-TM+MS2-CD | 0%, 20%, 30%, 0%, 10%, 10%, 90%, 70%, 70%                      |
| R3: dCas9-TM+MS2-TM | 10%, 0%, 20%, 0%, 20%, 70%, 90%, 80%, 70%                      |
| R8: dCas9-CD+MS2-CD | 0%, 30%, 20%, 0%, 0%, 10%, 100%, 30%, 60%                      |
| R8: dCas9-CD+MS2-TM | 10%, 30%, 30%, 0%, 0%, 20%, 100%, 50%, 70%                     |
| R8: dCas9-TM+MS2-CD | 0%, 30%, 40%, 0%, 0%, 20%, 90%, 50%, 60%                       |
| R8: dCas9-TM+MS2-TM | 0%, 30%, 20%, 30%, 10%, 50%, 100%, 50%, 100%                   |
