# Supplementary material for: A CRISPR-based approach for targeted DNA demethylation
Source: PubMed Central journal article supplement (PMC4853773; doi:10.1038/celldisc.2016.9), 2016-05-03
Supplement: celldisc20169-s5.pdf [file celldisc20169-s5.pdf]

**Supplementary Table 4** Percentages of methylated CpG in total CpGs identified using bisulfite-sequencing method (in *MAGEB2* gene).

| <b>Group names</b>  | <b>Left to right: -700 to -300 site (<i>MAGEB2</i> promoter)</b> |
|---------------------|------------------------------------------------------------------|
| blank               | 18.2%, 81.8%, 18.2%, 27.3%, 54.5%, 54.5%, 20%, 27.3%             |
| -sgRNA              | 53.8%, 69.2%, 15.4%, 30.8%, 61.5%, 46.2%, 38.5%, 53.8%           |
| M1: dCas9-CD+MS2-CD | 33.3%, 66.7%, 16.7%, 41.7%, 66.7%, 25%, 33.3%, 16.7%             |
| M3: dCas9-CD+MS2-CD | 9.1%, 36.4%, 0%, 9.1%, 36.4%, 27.3%, 9.1%, 63.6%                 |
| M4: dCas9-CD+MS2-CD | 25%, 41.7%, 8.3%, 0%, 41.7%, 33.3%, 16.7%, 33.3%                 |
| M7: dCas9-CD+MS2-CD | 36.4%, 36.4%, 0%, 0%, 54.5%, 27.3%, 9.1%, 45.5%                  |
