# Supplementary material for: A CRISPR-based approach for targeted DNA demethylation
Source: PubMed Central journal article supplement (PMC4853773; doi:10.1038/celldisc.2016.9), 2016-05-03
Supplement: celldisc20169-s6.pdf [file celldisc20169-s6.pdf]

**Supplementary Table 5** Sequences of the primers used in qRT-PCR assay.

| <b>Target gene</b> | <b>Forward primer (5'-3')</b> | <b>Reverse primer (5'-3')</b> | <b>Application</b>  |
|--------------------|-------------------------------|-------------------------------|---------------------|
| <i>GAPDH</i>       | ACCACAGTCCATGCCATCAC          | ATGACCTTGCCCACAGCCTT          | qRT-PCR             |
| <i>RANKL</i>       | ACTATTAATGCCACCGACA           | AGGGTATGAGAACTTGGGAT          | qRT-PCR             |
| <i>MAGEB2</i>      | GCTGCGGGTGTTCATCCA            | TGGTTAGAGGATCTTCGCTTGG        | qRT-PCR             |
| <i>MMP2</i>        | GATACCCCTTTGACGGTAAGGA        | CCTTCTCCCAAGGTCCATAGC         | qRT-PCR             |
| <i>CHST15</i>      | TCGTGTGGACAGTAAGCAGAT         | TGTAAGAAGCCATTACCAAGGTC       | Off-target analysis |
| <i>ULK4</i>        | GAAATAACCAACTGGGTCCGT         | CTGTGCAGAGTTCACCACT           | Off-target analysis |
| <i>SGPL1</i>       | CAGCTAATTGCATGGAGTGTCG        | CCTTGACCATAAACTCTCTGGC        | Off-target analysis |
| <i>TRAPPC9</i>     | ACGGCTCCACACTGTATGACT         | TCCTCGTAGTTGGGGTAGAAAG        | Off-target analysis |
| <i>TACR2</i>       | AGCAAGTCTACCTGGCACTCT         | GAAACCTGTGGTTGAGACAGC         | Off-target analysis |
| <i>LPCAT3</i>      | GGAGCTGAGCCTTAACAAGTT         | CAAAGCAAAGGGTAACCCAG          | Off-target analysis |
| <i>FRMD4A</i>      | TGAAACGGGACACTTAAACTGG        | AACCACGGGTCCTGACTTTTT         | Off-target analysis |
| <i>IDH2</i>        | CCCGTATTATCTGGCAGTTCATC       | ATCAGTCTGGTCACGGTTTGG         | Off-target analysis |
| <i>FARS2</i>       | CACATCCTTCCTTTGAGATGGAG       | CCAGCCGATTCCGGTCTTGA          | Off-target analysis |
| <i>KCNQ2</i>       | TGCCTGGTACATCGGCTTC           | GTAGGTGTCAAAGTGGTCGTTC        | Off-target analysis |

Ten pairs of primers used for off-target analysis were derived from the PrimerBank [1].

## Supplementary References

1 Spandidos A, Wang X, Wang H, *et al. Nucleic Acids Res* 2010; 38:D792-799.
