# Supplementary material for: A CRISPR-based approach for targeted DNA demethylation
Source: PubMed Central journal article supplement (PMC4853773; doi:10.1038/celldisc.2016.9), 2016-05-03
Supplement: celldisc20169-s7.pdf [file celldisc20169-s7.pdf]

**Supplementary Table 6** Sequences of primers used in the bisulfite DNA sequencing.

| <b>Target gene</b>             | <b>Forward primer (5'-3')</b>  | <b>Reverse primer (5'-3')</b> |
|--------------------------------|--------------------------------|-------------------------------|
| <i><b>RANKL-Fragment 1</b></i> | ATAGAGGTTTTTAAAAAGTTTTAGTAAGGT | ATAATCTCTAAAAACCCTTCCTATCC    |
| <i><b>RANKL-Fragment 2</b></i> | ATTTTTTAAATTTTAAGGAGGAAAT      | AAAACCAATCAACCCCAAAC          |
| <i><b>MAGEB2</b></i>           | GGTTTTAGGTTAAAGAGATAAAATTTA    | TAAACCTCACAAACCTAACAACAAC     |
